# Supplementary material for: Erroneous pixel prediction for semantic image segmentation
Source: Springer Nature journal article supplement (doi:10.1007/s41095-021-0235-7), 2021-10-27
Supplement: 41095_2021_235_MOESM1_ESM.pdf [file 41095_2021_235_MOESM1_ESM.pdf]

# Erroneous Pixel Prediction for Semantic Image Segmentation: Supplemental Material

Lixue Gong<sup>1</sup>, Yiqun Zhang<sup>1</sup>, Yunke Zhang<sup>1</sup>, Yin Yang<sup>2</sup> and Weiwei Xu<sup>1</sup> (✉)

© The Author(s) 2015. This article is published with open access at Springerlink.com

## 1 Introduction

This supplemental material introduces the network architecture of each branch in our model in detail. And more visual results on ADE20K [7] and Cityscapes [4] of each branch are provided.

## 2 Network Architecture

The architecture of the *error-prediction branch* and the *detail branch* are shown in Tab. 1 and Tab. 2 respectively. The Global Attention Upsampling module (GAU) [5] and the Xception block [3] are used as building blocks in both branches.

## 3 More Visual Results

**ADE20K validation set:** In Fig. 1, we show more segmentation results of our model training on ADE20K training set with DeepLabv3+ as the *semantic branch*.

**Cityscapes testing set:** We illustrate additional visual results on Cityscapes testing dataset in Fig. 4. This model training on Cityscapes *trainval.fine* dataset takes Xception71-DPC [1] as the *semantic branch*.

**Error-prediction:** The estimated error probability maps  $E_{ep}$  are illustrated in Fig. 2. Our method can detect most of ground truth erroneous pixels.

**Layer Cascade, Hard-mining and Bagging:** We have compared the quantitative results among Layer Cascade [6], Hard-mining and Bagging in the original paper. The visual results are show in Fig. 3. All these three strategies can improve the segmentation

results while the improvement of our method is the most significant.

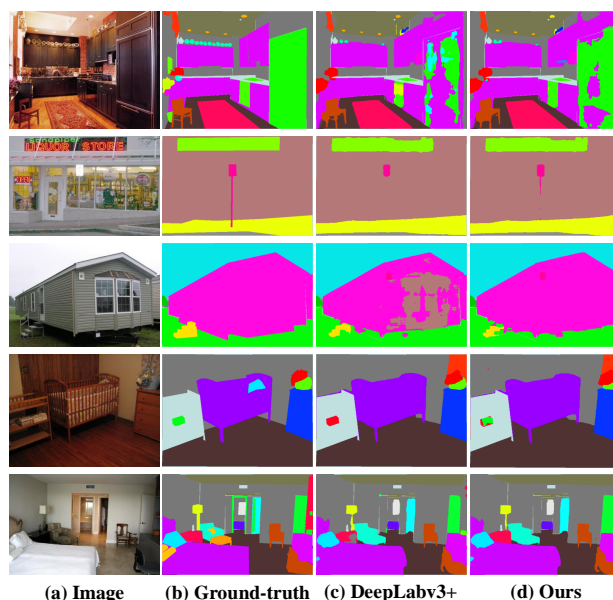

Fig. 1 Visual improvements on ADE20K validation set.

## References

- [1] L.-C. Chen, M. Collins, Y. Zhu, G. Papandreou, B. Zoph, F. Schroff, H. Adam, and J. Shlens. Searching for efficient multi-scale architectures for dense image prediction. In *NIPS*, pages 8713–8724, 2018.
- [2] L.-C. Chen, Y. Zhu, G. Papandreou, F. Schroff, and H. Adam. Encoder-decoder with atrous separable convolution for semantic image segmentation. In *ECCV*, pages 801–818, 2018.
- [3] F. Chollet. Xception: Deep learning with depthwise separable convolutions. In *CVPR*, pages 1251–1258, 2017.
- [4] M. Cordts, M. Omran, S. Ramos, T. Rehfeld, M. Enzweiler, R. Benenson, U. Franke, S. Roth, and B. Schiele. The cityscapes dataset for semantic urban scene understanding. In *CVPR*, pages 3213–3223, 2016.
- [5] H. Li, P. Xiong, J. An, and L. Wang. Pyramid attention

1 the State Key Laboratory of CAD & CG at Zhejiang University, 310058, China. E-mail: L. Gong, gonglx@zju.edu.cn; W. Xu, xww@cad.zju.edu.cn (✉).

2 School of Computing Clemson University, South Carolina, 29634, U.S..

Manuscript received: 2014-12-31; accepted: 2015-01-30.

**Tab. 1** Architecture of Error-prediction Branch

| Block name  | Layer type          | Stride | Ch I/O                        | Input                                |
|-------------|---------------------|--------|-------------------------------|--------------------------------------|
| sbp_feature | 3x3conv+GN+ReLU     | 2      | class_num/32                  | initial prediction $\mathbf{P}_{sb}$ |
| rgb_feature | 3x3conv+GN+ReLU     | 2      | 3/32                          | RGB Image                            |
| ep_input    | concat              | -      | 32+32/64                      | sbp_feature<br>rgb_feature           |
| conv1       | 3x3conv+GN+ReLU     | 1      | 64/64                         | ep_input                             |
| conv2       | 3x3conv+GN+ReLU     | 1      | 64/64                         | conv1                                |
| max_pool    | 2x2max_pool         | 2      | 64/64                         | conv2                                |
| gau1        | GAU Block [5]       | 1      | 64,1280/128                   | max_pool<br>aspp_concat_out          |
| unit1       | Xception Block [3]  | 1      | 128/128<br>128/128<br>128/128 | GAU1                                 |
| unit2       | Xception Block+ReLU | 1      | 128/256<br>256/256<br>256/256 | unit1                                |
| error_probs | 3x3Conv+sigmoid     | 1      | 256/1                         | unit2                                |

**Tab. 2** Architecture of Detail Branch

| Block name | Layer type          | Stride | Ch I/O        | Input                                              |
|------------|---------------------|--------|---------------|----------------------------------------------------|
| gau3       | GAU Block           | 1      | 728, 1280/512 | Xception_entryflow_block5_unit1<br>aspp_concat_out |
| gau3_conv0 | 3x3seperable_conv2d | 1      | 512/512       | gau3                                               |
| gau3_conv1 | 3x3seperable_conv2d | 1      | 512/512       | gau3_conv0                                         |
| gau3_relu  | Add+ReLU            | -      | 512, 512/512  | gau3_conv1<br>gau3                                 |
| gau2       | GAU Block           | 1      | 256, 512/256  | Xception_entryflow_block3_unit1<br>gau3_relu       |
| gau2_conv0 | 3x3seperable_conv2d | 1      | 256/256       | gau2                                               |
| gau2_conv1 | 3x3seperable_conv2d | 1      | 256/256       | gau2_conv0                                         |
| gau2_relu  | Add+ReLU            | -      | 256, 256/256  | gau2_conv1<br>gau2                                 |
| gau1       | GAU Block           | 1      | 128, 256/128  | Xception_entryflow_block1_unit1<br>gau2_relu       |
| gau1_conv0 | 3x3seperable_conv2d | 1      | 128/128       | gau1                                               |
| gau1_conv1 | 3x3seperable_conv2d | 1      | 128/128       | gau1_conv0                                         |
| gau1_relu  | Add+ReLU            | -      | 128, 128/128  | gau1_conv1<br>gau1                                 |
| db_logits  | 3x3conv2d           | 1      | 19/19         | gau1_relu                                          |

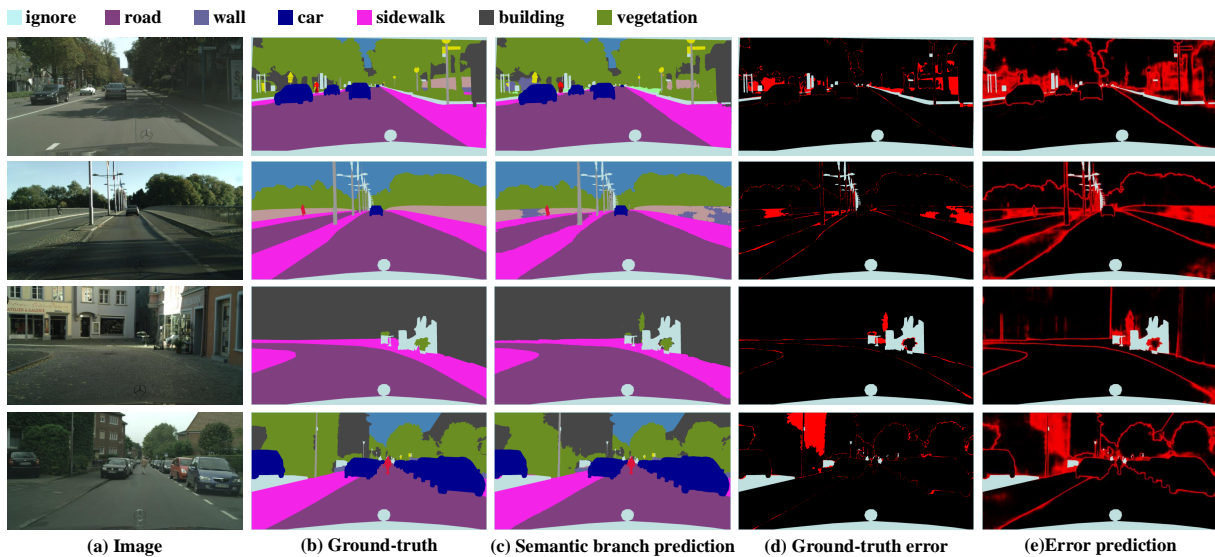

**Fig. 2** (a) Input images. (b) The ground-truth semantic label map provided by Cityscapes dataset. (c) The semantic segmentation result output by the semantic branch, DeepLabv3+ in this case. (d) The ground-truth error map. (e) The error probability map generated by our error-prediction branch. the error probability of value 1 is colored in red, and 0 in black. White pixels indicate the unlabeled pixels in the dataset.

network for semantic segmentation. *arXiv preprint arXiv:1805.10180*, 2018.

- [6] X. Li, Z. Liu, P. Luo, C. Change Loy, and X. Tang. Not all pixels are equal: Difficulty-aware semantic segmentation via deep layer cascade. In *CVPR*, pages

3193–3202, 2017.

- [7] B. Zhou, H. Zhao, X. Puig, S. Fidler, A. Barriuso, and A. Torralba. Scene parsing through ade20k dataset. In *CVPR*, pages 633–641, 2017.

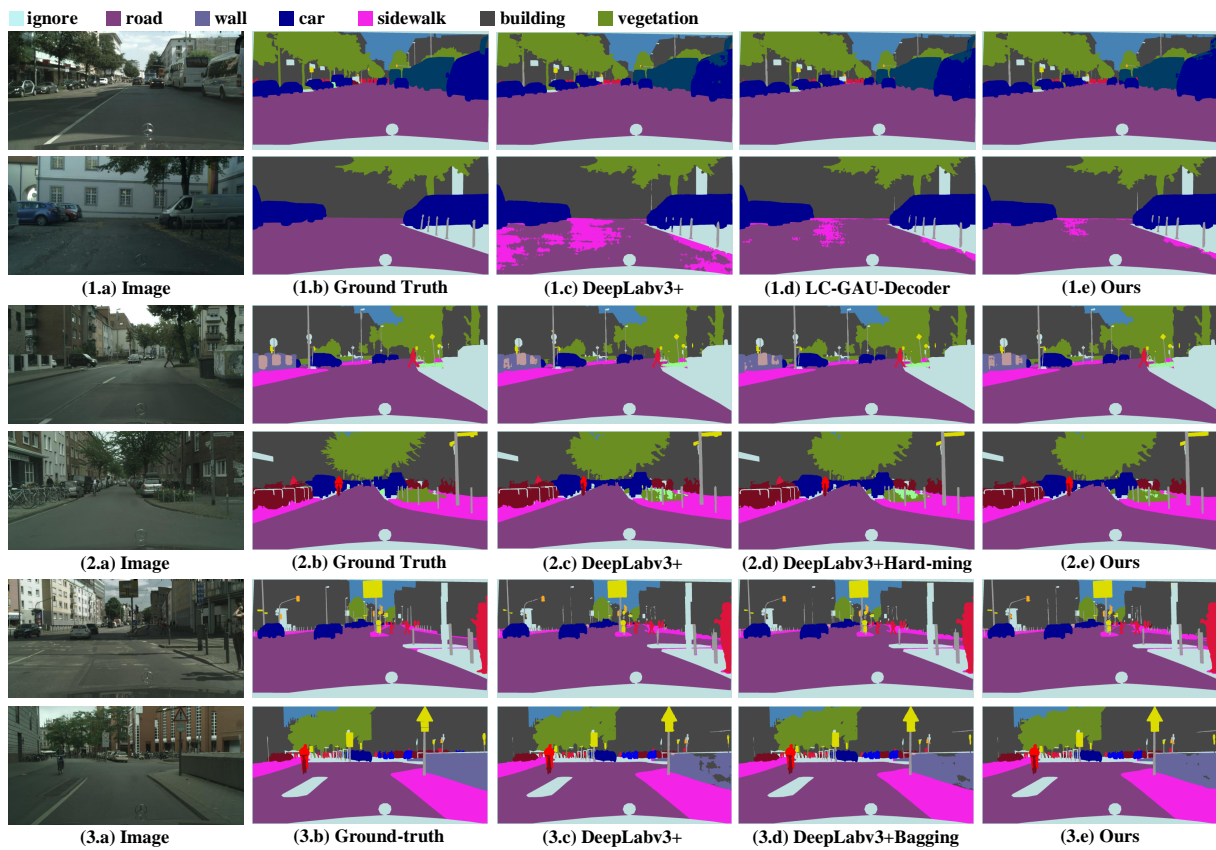

**Fig. 3** Visual comparison. (1.a)-(1.e): Comparison with ‘LC [6]-GAU-Decoder’; (2.a)-(2.e): Comparison with ‘DeepLabv3+ [2]+Hard-mine’; (3.a)-(3.e): Comparison with ‘DeepLabv3+ [2]+Bagging’.

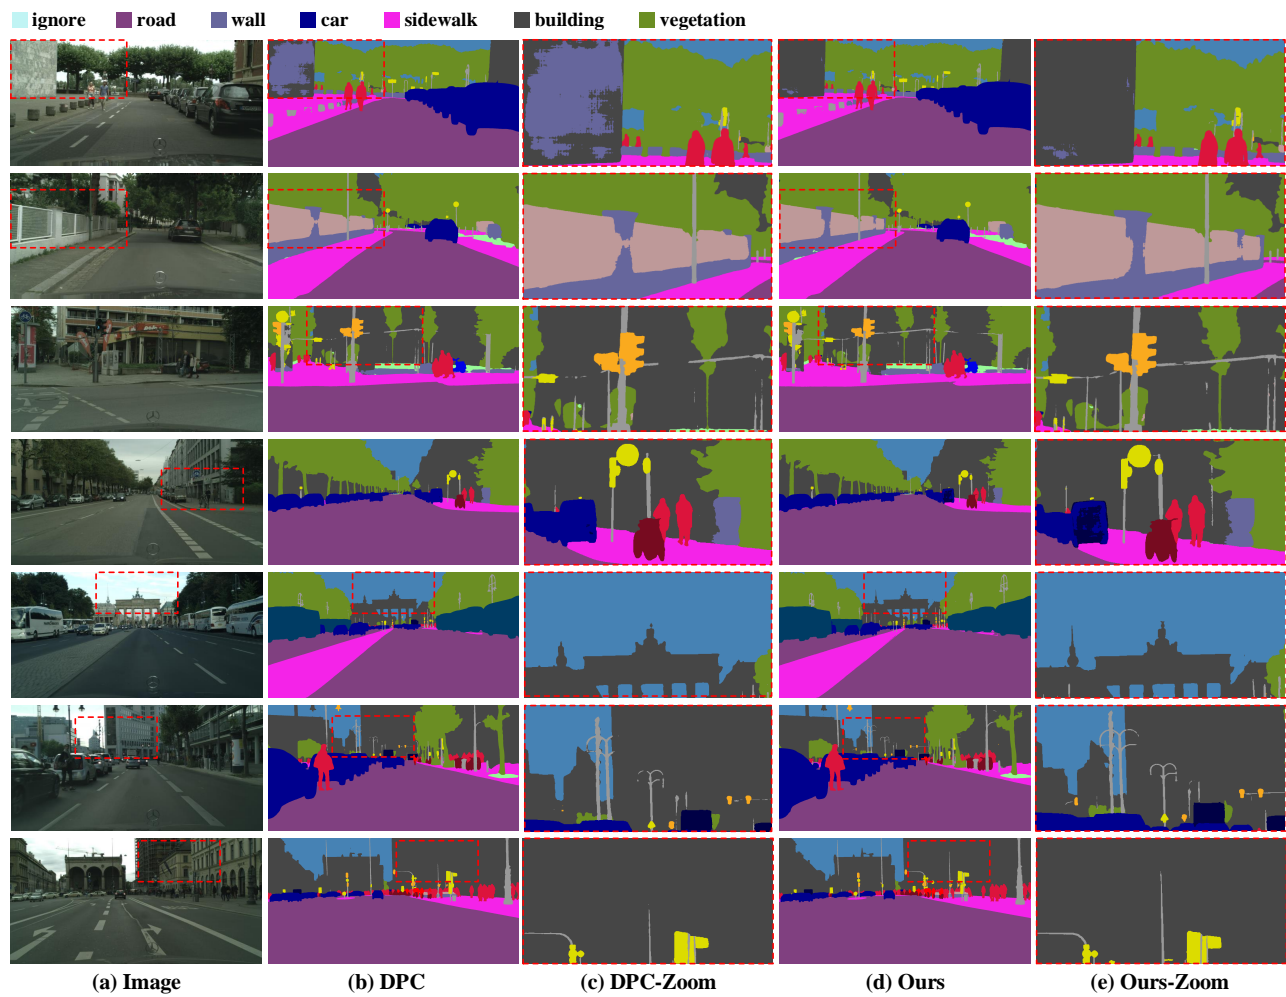

**Fig. 4** Visual results on Cityscapes testing set. Comparing the details in segmentation result, our method has better performance than Xception71-DPC [1] which we take as the *semantic branch*. The dashed rectangles highlight the regions where our method can effectively correct the errors in the front end model results.
